# Supplementary material
Source: PubMed Central journal article supplement (PMC5689111)
Supplement: Supp_Fig4.pdf [file Supp_Fig4.pdf]

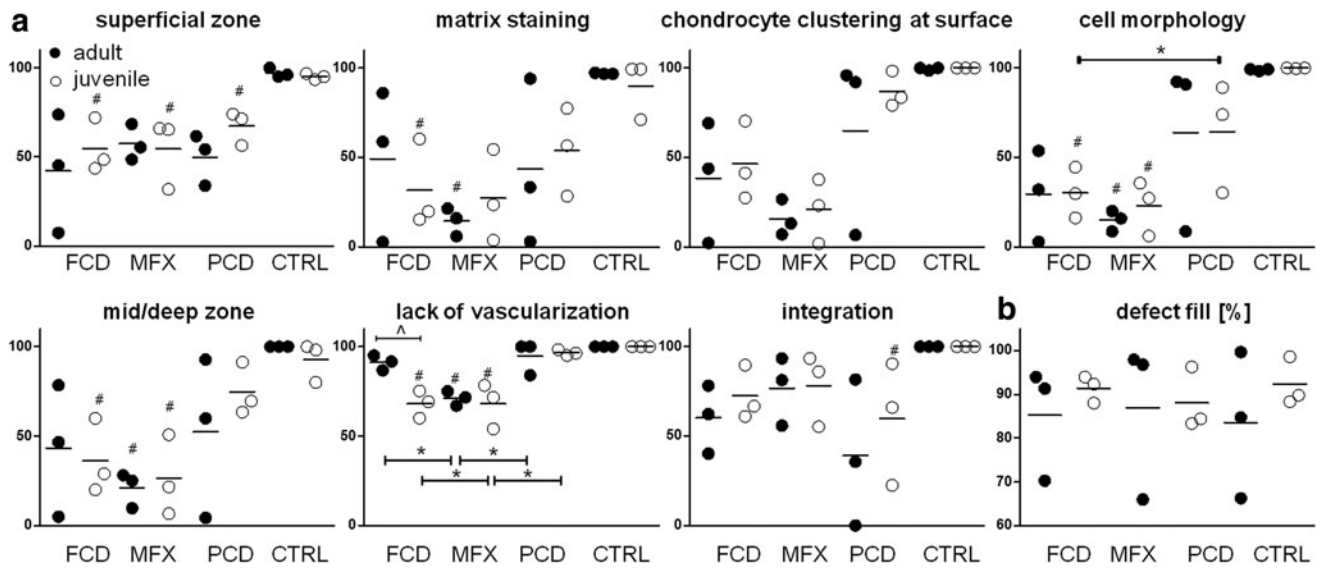

**SUPPLEMENTARY FIG. S4.** (a) Additional categories from ICRS II scoring (compared with Fig. 6a); # $p < 0.006$  compared with age-adjusted control group; \* $p < 0.006$  between age-related groups; ^ $p < 0.025$  between ages within same treatment group. (b) Quantitative micro-CT analysis of defect fill. *Full circles*=adult minipigs; *empty circles*=juvenile minipigs. CT, computed tomography.
