# Supplementary material
Source: PubMed Central journal article supplement (PMC5689111)
Supplement: Supp_Fig5.pdf [file Supp_Fig5.pdf]

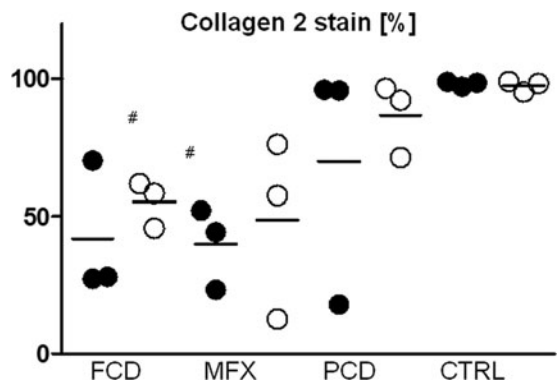

**SUPPLEMENTARY FIG. S5.** Quantification of collagen II staining in cartilage defects, # $p < 0.006$  compared with age-adjusted control group; *full circles* = adult minipigs; *empty circles* = juvenile minipigs.
