# Supplementary material
Source: PubMed Central journal article supplement (PMC5689111)
Supplement: Supp_Figs1-3.pdf [file Supp_Figs1-3.pdf]

## Supplementary Data

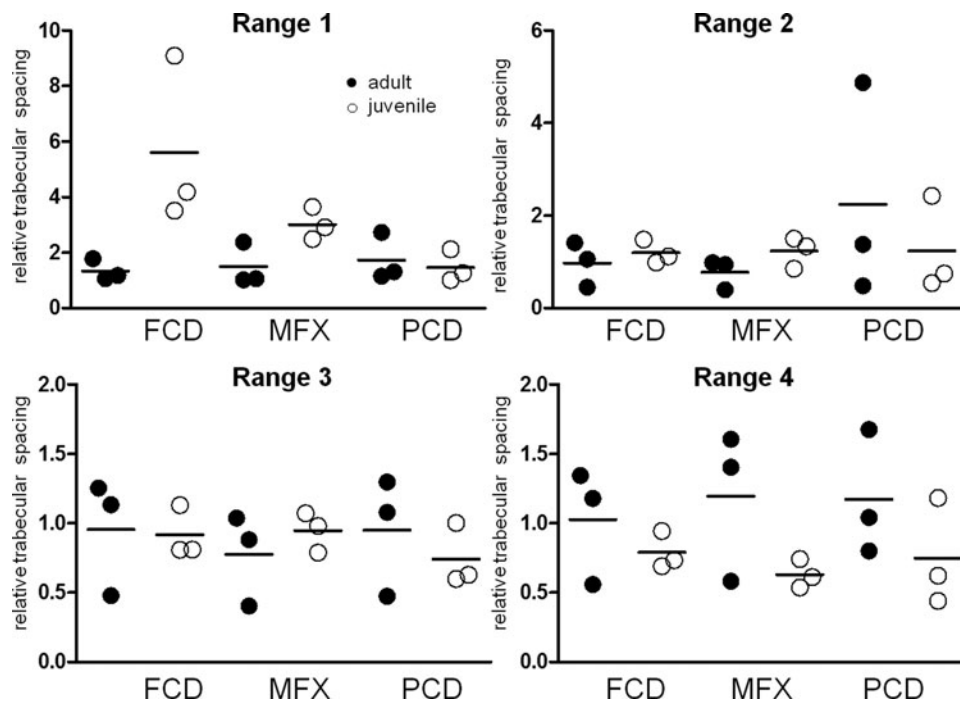

**SUPPLEMENTARY FIG. S1.** Analysis of trabecular spacing throughout the ranges of measurement (Fig. 3c) relative to adjacent control samples. Significant differences ( $p < 0.05$ ) were detected for age in the overall two-way ANOVA in range 1 and range 4; *full circles*=adult minipigs; *empty circles*=juvenile minipigs. ANOVA, analysis of variance.

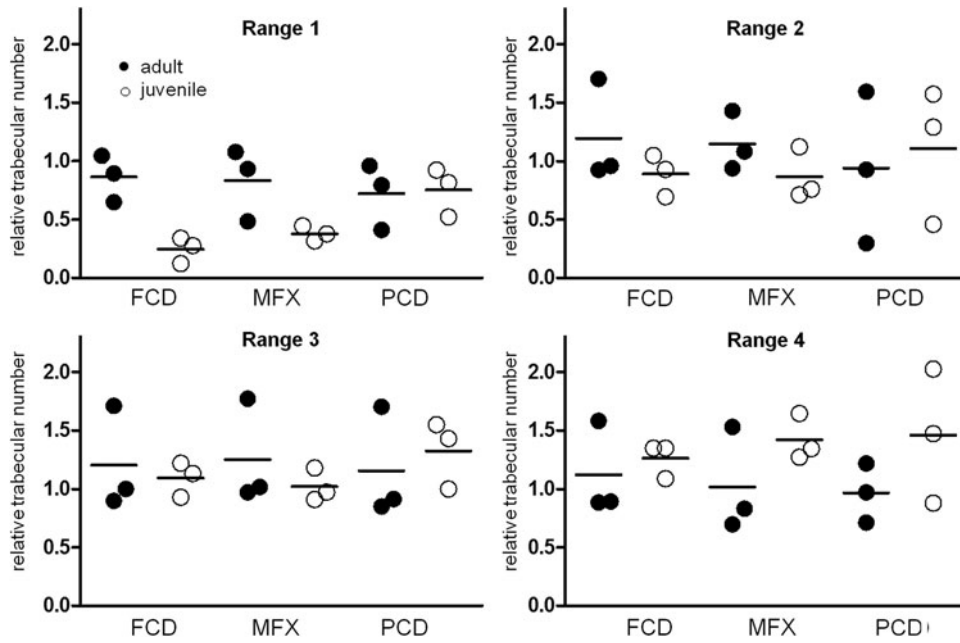

**SUPPLEMENTARY FIG. S2.** Analysis of trabecular number throughout the ranges of measurement (Fig. 3c) relative to adjacent control samples. Significant differences ( $p < 0.05$ ) were detected for age in the overall two-way ANOVA in range 1; *full circles* = adult minipigs; *empty circles* = juvenile minipigs.

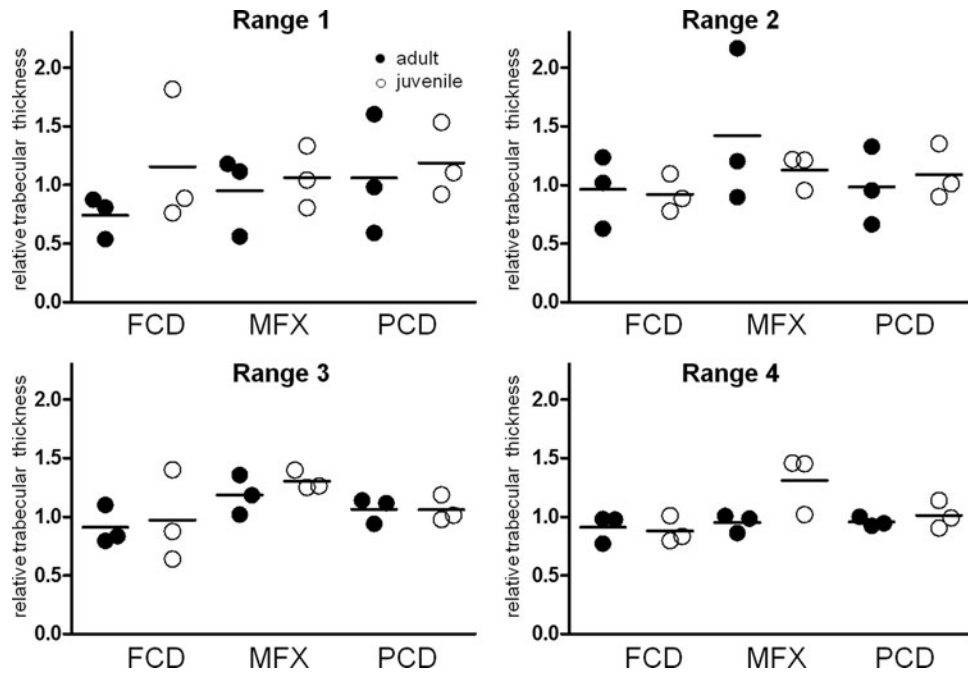

**SUPPLEMENTARY FIG. S3.** Analysis of trabecular thickness throughout the ranges of measurement (Fig. 3c) relative to adjacent control samples; *full circles* = adult minipigs; *empty circles* = juvenile minipigs.
